# Supplementary material
Source: MDPI journal article supplement (https://www.mdpi.com/2227-9717/11/11/3064)
Supplement: s1 [file s1]

Archive with 2 entries (2 files):
- Figures S1-S10.pdf
- Table S1.pdf
