# Supplementary material
Source: MDPI journal article supplement (https://www.mdpi.com/2227-9717/11/11/3064)
Supplement: s1 [file s1 › Table S1.pdf]

**Table S1.** Screened ADMET properties for 49 *Piper betle* compounds

| Molecule    | Stars | mol_MW  | donor HB | accpt HB | QPlog Po/w | QPlogS | QPP Caco | QPlogBB | QPP MDCK | Human Oral Absorption | QPlog Khsa | #metab | QPlog HERG | Rule Of Five | Rule Of Three |
|-------------|-------|---------|----------|----------|------------|--------|----------|---------|----------|-----------------------|------------|--------|------------|--------------|---------------|
| IMPHY001368 | 0     | 344.407 | 1        | 5.95     | 3.438      | -4.196 | 2284.676 | -0.549  | 1557.521 | 100                   | 1.035      | 5      | -4.797     | 1            | 1             |
| IMPHY002191 | 0     | 358.433 | 1        | 5.95     | 3.745      | -4.43  | 2858.892 | -0.413  | 1208.361 | 100                   | 0.228      | 7      | -4.481     | 0            | 1             |
| IMPHY005374 | 0     | 234.251 | 0        | 5        | 1.972      | -2.576 | 1565.198 | -0.318  | 1539.734 | 100                   | 0.33       | 7      | -4.454     | 0            | 1             |
| IMPHY006709 | 0     | 206.241 | 0        | 3.25     | 2.67       | -2.956 | 3873.461 | -0.384  | 746.792  | 93.286                | -0.389     | 3      | -3.845     | 0            | 0             |
| IMPHY007615 | 0     | 234.251 | 0        | 5        | 1.894      | -2.164 | 1755.31  | 0.89    | 5899.293 | 100                   | 0.879      | 3      | -3.965     | 1            | 1             |
| IMPHY008892 | 0     | 400.471 | 0        | 6.25     | 4.098      | -4.803 | 1961.3   | 0.868   | 5899.293 | 100                   | 0.4        | 4      | -3.859     | 0            | 0             |
| IMPHY017327 | 0     | 172.267 | 2        | 2.45     | 1.747      | -2.172 | 1694.628 | -0.129  | 1647.426 | 100                   | -0.108     | 3      | -3.954     | 0            | 0             |
| IMPHY001073 | 0     | 386.444 | 1        | 6.25     | 3.347      | -4.471 | 509.281  | 1.076   | 5899.293 | 100                   | 0.973      | 6      | -2.896     | 1            | 1             |
| IMPHY001240 | 0     | 141.169 | 1        | 4        | -1.495     | -0.77  | 54.287   | 0.036   | 1844.599 | 100                   | 1.65       | 3      | -4.292     | 1            | 1             |
| IMPHY003129 | 1     | 150.177 | 2        | 1.5      | 1.654      | -1.336 | 1463.748 | 1.113   | 5899.293 | 100                   | 0.997      | 7      | -3.032     | 1            | 2             |
| IMPHY005639 | 1     | 155.196 | 0        | 4        | 0.442      | -0.174 | 605.79   | 1.059   | 5899.293 | 100                   | 0.938      | 2      | -3.21      | 1            | 1             |
| IMPHY006362 | 1     | 176.126 | 4        | 7.9      | -1.851     | -0.64  | 36.244   | 0.849   | 5899.293 | 100                   | 0.402      | 4      | -3.407     | 0            | 0             |
| IMPHY006593 | 1     | 150.177 | 2        | 1.5      | 1.593      | -1.376 | 1069.106 | 1.086   | 5899.293 | 100                   | 0.949      | 4      | -3.445     | 1            | 1             |
| IMPHY009708 | 1     | 176.215 | 0        | 2.5      | 2.281      | -2.526 | 3609.328 | -0.127  | 5899.293 | 100                   | -0.194     | 1      | -3.269     | 0            | 0             |
| IMPHY011519 | 1     | 196.2   | 0        | 2        | 3.206      | -3.77  | 4011.929 | -1.641  | 134.684  | 91.918                | 0.788      | 1      | -3.61      | 1            | 1             |

|             |   |             |   |      |        |        |          |        |          |        |        |   |        |   |   |
|-------------|---|-------------|---|------|--------|--------|----------|--------|----------|--------|--------|---|--------|---|---|
|             |   | 89          |   |      |        |        |          |        |          |        |        |   |        |   |   |
| IMPHY000846 | 1 | 376.3<br>68 | 5 | 12.3 | -0.982 | -2.718 | 10.817   | -0.451 | 802.891  | 95.668 | -0.425 | 1 | -4.547 | 0 | 0 |
| IMPHY001308 | 2 | 286.4<br>56 | 1 | 1.7  | 5.424  | -6.073 | 2889.433 | 1.029  | 5899.293 | 100    | 0.998  | 5 | -2.929 | 1 | 1 |
| IMPHY003536 | 2 | 164.2<br>04 | 1 | 1.5  | 2.661  | -2.387 | 3043.414 | 0.365  | 318.38   | 79.332 | -0.7   | 3 | -4.107 | 0 | 0 |
| IMPHY003681 | 2 | 414.6<br>27 | 1 | 3.2  | 6.136  | -7.338 | 3378.96  | 0.702  | 5899.293 | 100    | 0.343  | 2 | -3.714 | 0 | 0 |
| IMPHY004631 | 2 | 284.4<br>81 | 1 | 2    | 6.033  | -6.388 | 240.229  | -0.13  | 1648.664 | 100    | -0.106 | 3 | -3.982 | 0 | 0 |
| IMPHY006297 | 2 | 164.2<br>04 | 1 | 1.5  | 2.667  | -2.405 | 3045.528 | -0.049 | 1088.858 | 96.881 | -0.203 | 2 | -2.795 | 0 | 0 |
| IMPHY006325 | 2 | 150.2<br>2  | 0 | 2    | 1.805  | -2.057 | 2074.833 | -1.809 | 13.711   | 44.013 | -0.947 | 5 | -2.827 | 0 | 0 |
| IMPHY006946 | 2 | 222.3<br>7  | 1 | 0.75 | 3.929  | -4.135 | 5517.682 | 0.922  | 5899.293 | 100    | 0.427  | 4 | -3.807 | 0 | 0 |
| IMPHY006970 | 2 | 156.2<br>67 | 0 | 2    | 2.749  | -2.712 | 2164.94  | -1.933 | 1785.814 | 100    | 2.535  | 1 | -6.85  | 1 | 1 |
| IMPHY007840 | 2 | 220.3<br>54 | 1 | 0.75 | 3.932  | -4.228 | 4917.97  | -0.512 | 531.763  | 90.488 | -0.377 | 3 | -3.881 | 0 | 0 |
| IMPHY011521 | 2 | 170.2<br>94 | 0 | 2    | 3.298  | -3.334 | 3953.378 | 0.102  | 5899.293 | 100    | 0.069  | 3 | -3.928 | 0 | 0 |
| IMPHY011542 | 2 | 222.3<br>7  | 1 | 0.75 | 4.012  | -4.191 | 5034.539 | -0.069 | 2138.039 | 100    | -0.151 | 2 | -4.496 | 0 | 0 |
| IMPHY011640 | 2 | 164.2<br>04 | 1 | 1.5  | 2.818  | -2.501 | 3043.83  | 0.258  | 5899.293 | 100    | 0.081  | 2 | -4.018 | 0 | 0 |
| IMPHY014847 | 2 | 196.2<br>89 | 0 | 2    | 2.898  | -3.308 | 3748.856 | 0.296  | 3134.016 | 100    | 0.669  | 1 | -2.686 | 0 | 0 |
| IMPHY014857 | 2 | 222.3<br>7  | 1 | 0.75 | 3.738  | -3.823 | 5372.81  | -0.56  | 1140.059 | 100    | -0.077 | 1 | -3.94  | 0 | 0 |
| IMPHY014986 | 2 | 222.3<br>7  | 1 | 0.75 | 3.964  | -4.15  | 6008.905 | -0.059 | 1625.784 | 100    | -0.17  | 2 | -3.965 | 0 | 0 |
| IMPHY015022 | 2 | 222.3<br>7  | 1 | 0.75 | 4.94   | -5.161 | 5461.821 | -0.505 | 72.584   | 69.038 | -0.903 | 2 | -1.496 | 0 | 0 |

|             |   |             |   |      |       |        |          |        |          |        |        |   |        |   |   |
|-------------|---|-------------|---|------|-------|--------|----------|--------|----------|--------|--------|---|--------|---|---|
| IMPHY015042 | 2 | 152.2<br>36 | 0 | 2    | 2.174 | -2.133 | 4055.026 | 1.082  | 5899.293 | 100    | 1.005  | 2 | -3.337 | 1 | 1 |
| IMPHY015128 | 2 | 222.3<br>7  | 1 | 0.75 | 4.091 | -4.493 | 4939.358 | -1.128 | 2.271    | 34.379 | -1.22  | 0 | 1.514  | 0 | 1 |
| IMPHY007317 | 3 | 134.1<br>77 | 1 | 0.75 | 2.207 | -1.365 | 3006.405 | 1.115  | 5899.293 | 100    | 0.987  | 4 | -3.078 | 1 | 1 |
| IMPHY007357 | 3 | 123.1<br>11 | 1 | 3.5  | 0.671 | -0.714 | 135.594  | 1.142  | 5899.293 | 100    | 1.011  | 0 | -3.04  | 1 | 1 |
| IMPHY011396 | 3 | 154.2<br>52 | 1 | 0.75 | 2.978 | -2.625 | 5690.09  | -0.364 | 908.799  | 96.106 | -0.485 | 1 | -4.25  | 0 | 0 |
| IMPHY011558 | 3 | 222.2<br>4  | 0 | 3    | 2.538 | -3.033 | 9906.038 | 0.25   | 2767.507 | 100    | 0.67   | 3 | -2.99  | 0 | 0 |
| IMPHY012036 | 3 | 152.2<br>36 | 0 | 2    | 1.945 | -1.99  | 3964.568 | -0.508 | 1024.603 | 100    | 0.358  | 6 | -4.699 | 0 | 0 |
| IMPHY012058 | 3 | 154.2<br>52 | 1 | 0.75 | 3.14  | -2.959 | 5247.419 | 2.502  | 5899.293 | 100    | 3.263  | 0 | -6.91  | 1 | 1 |
| IMPHY012104 | 3 | 156.2<br>67 | 1 | 1.7  | 2.714 | -2.603 | 3373.526 | 1.102  | 5899.293 | 100    | 1.021  | 6 | -3.476 | 1 | 1 |
| IMPHY012160 | 3 | 154.2<br>52 | 1 | 0.75 | 2.962 | -2.67  | 4922.657 | -0.641 | 2571.893 | 100    | 2.375  | 5 | -5.755 | 1 | 1 |
| IMPHY012265 | 3 | 152.2<br>36 | 1 | 1.7  | 2.14  | -2.266 | 4048.342 | 2.761  | 5899.293 | 100    | 3.789  | 0 | -7.242 | 1 | 1 |
| IMPHY012712 | 3 | 296.5<br>35 | 1 | 1.7  | 6.366 | -7.075 | 2842.463 | -0.026 | 1980.897 | 100    | -0.145 | 1 | -4.526 | 0 | 0 |
| IMPHY013133 | 3 | 154.2<br>52 | 1 | 0.75 | 2.958 | -2.709 | 4250.74  | 0.875  | 5899.293 | 100    | 0.401  | 1 | -3.436 | 0 | 0 |
| IMPHY013835 | 3 | 152.2<br>36 | 0 | 2    | 2.07  | -2.035 | 4878.541 | 0.605  | 5899.293 | 100    | 0.224  | 1 | -2.597 | 0 | 0 |
| IMPHY000099 | 3 | 152.2<br>36 | 1 | 1.7  | 2.11  | -2.178 | 3780.468 | 0.995  | 5899.293 | 100    | 0.948  | 4 | -3.725 | 1 | 1 |
| IMPHY001144 | 3 | 222.2<br>4  | 0 | 3    | 2.216 | -2.751 | 9906.038 | 1.014  | 5899.293 | 100    | 0.979  | 6 | -3.616 | 1 |   |
